# Supplementary material
Source: Royal Society of Chemistry journal article supplement (doi:10.1039/d6nr00581k)
Supplement: d6nr00581k1.pdf [file d6nr00581k1.pdf]

## *Supplementary Information*

# **Real-time visualization of plasmonic nanoparticle growth dynamics by high-speed atomic force microscopy**

Fuma Wakabayashi<sup>1</sup>, Kenta Tamaki<sup>2</sup>, Feng-Yueh Chan<sup>2</sup>, Takayuki Uchihashi<sup>2,3</sup>, Prabhat Verma<sup>1</sup>, Takayuki Umakoshi<sup>1\*</sup>

1. Department of Applied Physics, The University of Osaka, 2-1 Yamadaoka, Suita, Osaka 565-0871 Japan
2. Department of Physics, Nagoya University, Furo-cho, Chikusa-ku, Nagoya, Aichi 464-8602, Japan
3. Exploratory Research Center on Life and Living Systems, National Institutes of Natural Sciences, 5-1 Higashiyama, Myodaiji, Okazaki, Aichi 444-8787, Japan

\*E-mail: [umakoshi@ap.eng.osaka-u.ac.jp](mailto:umakoshi@ap.eng.osaka-u.ac.jp)

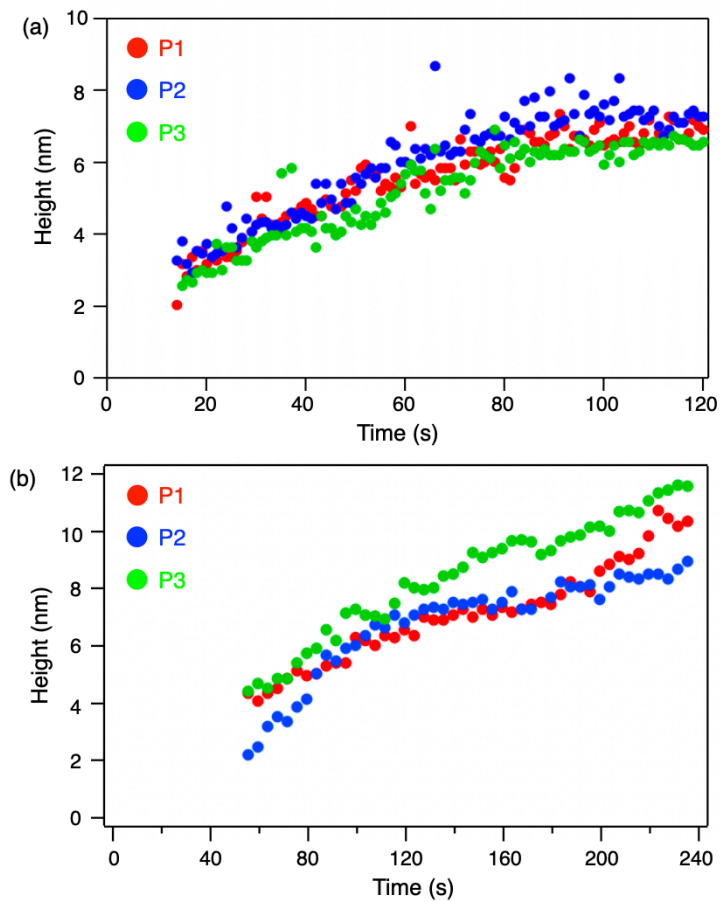

**Supplementary Figure S1.** (a) Temporal evolution of the heights of AgNP **P1**, **P2**, and **P3** in Fig. 2(a). (b) Temporal evolution of the heights of AgNP **P1**, **P2**, and **P3** in Fig. 3(a).

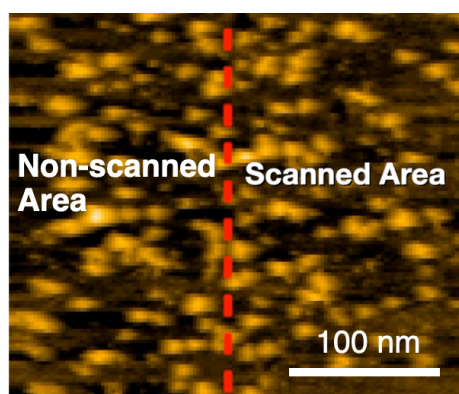

**Supplementary Figure S2.** HS-AFM image at the boundary between the tip-scanned and unscanned areas after AgNP formation, showing that the influence of tip scanning on AgNPs is negligible.

**Supplementary Movie S1:**

HS-AFM movie showing the nucleation and growth dynamics of AgNPs formed via photoreduction at a laser intensity of  $10\text{W}/\text{cm}^2$ , captured in a  $300 \times 300 \text{ nm}^2$  range,  $128 \times 128$  pixels, at 1 fps.

**Supplementary Movie S2:**

HS-AFM movie acquired in the absence of the reducing agents as a negative control. No nucleation or growth of AgNPs was observed under laser irradiation at  $10 \text{ W}/\text{cm}^2$ , captured in a  $300 \times 300 \text{ nm}^2$  range,  $128 \times 128$  pixels, at 1 fps.

**Supplementary Movie S3:**

HS-AFM movie acquired outside the laser-irradiated spot as a negative control. No nucleation or growth of AgNPs was observed under laser irradiation at  $10\text{W}/\text{cm}^2$ , captured in a  $300 \times 300 \text{ nm}^2$  range,  $128 \times 128$  pixels, at 1 fps.

**Supplementary Movie S4:**

Magnified HS-AFM movie extracted from Supplementary Movie S1, showing AgNP **P1** indicated in Figure 2a. The movie size is  $60 \times 60 \text{ nm}^2$ .

**Supplementary Movie S5:**

Magnified HS-AFM movie extracted from Supplementary Movie S1, showing AgNP **P2** indicated in Figure 2a. The movie size is  $60 \times 60 \text{ nm}^2$ .

**Supplementary Movie S6:**

Magnified HS-AFM movie extracted from Supplementary Movie S1, showing AgNP **P3** indicated in Figure 2a. The movie size is  $60 \times 60 \text{ nm}^2$ .

**Supplementary Movie S7:**

HS-AFM movie of the surrounding areas outside the original scan area, acquired after AgNPs formation by laser irradiation (after taking Supplementary Movie S1), showing that tip scanning does not noticeably affect AgNP growth. The laser intensity was  $10\text{W}/\text{cm}^2$ . This movie was captured in a  $300 \times 300 \text{ nm}^2$  range,  $128 \times 128$  pixels, at 1 fps.

**Supplementary Movie S8:**

HS-AFM movie showing the nucleation and growth dynamics of AgNPs formed via photoreduction at a laser intensity of  $60\text{W}/\text{cm}^2$ , captured in a  $300 \times 300 \text{ nm}^2$  range,  $128 \times 128$  pixels, at 1 fps.

**Supplementary Movie S9:**

Magnified HS-AFM movie extracted from Supplementary Movie S8, showing AgNP **P1** indicated in Figure 3a. The movie size is  $60 \times 60 \text{ nm}^2$ .

**Supplementary Movie S10:**

Magnified HS-AFM movie extracted from Supplementary Movie S8, showing AgNP **P2** indicated in Figure 3a. The movie size is  $60 \times 60 \text{ nm}^2$ .

**Supplementary Movie S11:**

Magnified HS-AFM movie extracted from Supplementary Movie S8, showing AgNP **P3** indicated in Figure 3a. The movie size is  $60 \times 60 \text{ nm}^2$ .

**Supplementary Movie S12:**

HS-AFM movie showing the nucleation and growth dynamics of AgNPs formed via photoreduction at a laser intensity of  $480 \text{ W/cm}^2$ , captured in a  $300 \times 300 \text{ nm}^2$  range,  $128 \times 128$  pixels, at 1 fps.
